# Supplementary material for: Enantioselective Total Synthesis of Multifidene, a Sex Pheromone of Brown Algae
Source: MDPI journal article supplement (doi:10.3390/org3030015), 2022-07-08
Supplement: s1 [file s1]

Archive with 1 entries (1 files):
- organics-1712658-supplementary.pdf
