# Supplementary material for: Enantioselective Total Synthesis of Multifidene, a Sex Pheromone of Brown Algae
Source: MDPI journal article supplement (doi:10.3390/org3030015), 2022-07-08
Supplement: s1 [file s1 › organics-1712658-supplementary.pdf]

## Article

# Enantioselective Total Synthesis of Multifidene and a Sex Pheromone of Brown Algae

Taiki Umezawa <sup>1,\*</sup>, Misaki Hara <sup>1</sup>, Nana Kinoshita-Terauchi <sup>2</sup> and Fuyuhiko Matsuda <sup>1</sup>
<sup>1</sup> Division of Environmental Materials Science, Graduate School of Environmental Science, Hokkaido University, Sapporo 060-0810, Japan; hmisaki@ees.hokudai.ac.jp (M.H.); fmatsuda@ees.hokudai.ac.jp (F.M.)

<sup>2</sup> Shimoda Marine Research Center, University of Tsukuba, 5-10-1 Shimoda, Shizuoka 415-0025, Japan; nana@shimoda.tsukuba.ac.jp

\* Correspondence: umezawa@ees.hokudai.ac.jp; Tel.: +81-11-706-235

## Table of Contents

| Determination of Enantiopurity of <b>9</b>                             | S2  |
|------------------------------------------------------------------------|-----|
| Figure S1. <sup>1</sup> H and <sup>13</sup> C NMR spectra of <b>S1</b> | S3  |
| Figure S2. <sup>1</sup> H and <sup>13</sup> C NMR spectra of <b>9</b>  | S4  |
| Figure S3. <sup>1</sup> H and <sup>13</sup> C NMR spectra of <b>10</b> | S5  |
| Figure S4. <sup>1</sup> H and <sup>13</sup> C NMR spectra of <b>14</b> | S6  |
| Figure S5. <sup>1</sup> H and <sup>13</sup> C NMR spectra of <b>15</b> | S7  |
| Figure S6. <sup>1</sup> H and <sup>13</sup> C NMR spectra of <b>1</b>  | S8  |
| Figure S7. <sup>1</sup> H and <sup>13</sup> C NMR spectra of <b>S2</b> | S9  |
| Figure S8. <sup>1</sup> H NMR spectrum of <b>S3</b>                    | S10 |
| Figure S9. <sup>1</sup> H NMR spectrum of <b>S4</b>                    | S10 |

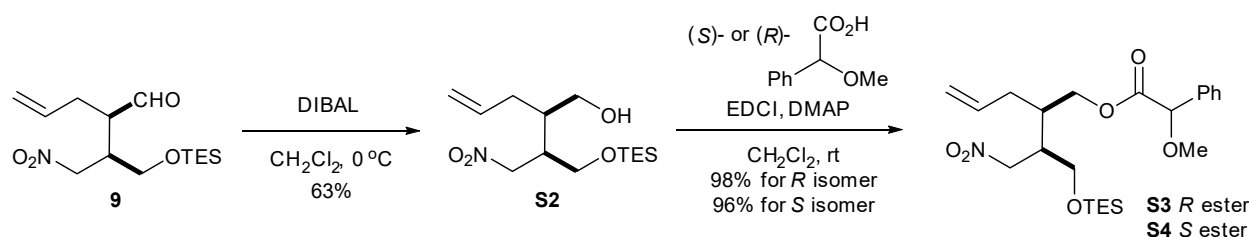

## Determination of Enantiopurity of **9**.

### Alcohol **S2**.

To a solution of **9** (187 mg, 0.621 mmol) in CH<sub>2</sub>Cl<sub>2</sub> (2.0 mL) was added DIBAL (1.00 M in toluene, 0.931 mL, 0.931 mmol) at 0 °C under Ar atmosphere. The mixture was stirred for 20 min, quenched with saturated Na<sub>2</sub>K-tartrate, stirred for 30 min, extracted with Ac-OEt, washed with brine, dried over Na<sub>2</sub>SO<sub>4</sub>, filtered, and concentrated in *vacuo*. The residue was purified by silica gel column chromatography (hexane:EtOAc = 95:5 then 90:10) to give the alcohol **S2** (120 mg, 0.396 mmol, 63%) as a colorless oil: [α]<sub>D</sub><sup>23</sup> +15.8 (*c* 2.50, CHCl<sub>3</sub>); IR (neat) 3420, 3077, 2956, 2911, 2877, 1640, 1758, 1431, 1416, 1378, 1240, 1094, 1005, 916, 792 cm<sup>-1</sup>; <sup>1</sup>H NMR (CDCl<sub>3</sub>, 400 MHz) δ 0.62 (6H, q, *J* = 7.8 Hz), 0.96 (9H, t, *J* = 7.8 Hz), 1.86–1.92 (1H, m), 2.08–2.18 (2H, m), 2.62–2.67 (1H, m), 3.62–3.68 (2H, m), 3.78 (1H, dd, *J* = 10.7, 4.9 Hz), 4.46 (1H, dd, *J* = 13.2, 4.9 Hz), 4.60 (1H, dd, *J* = 12.9, 9.3 Hz), 5.09 (1H, d, *J* = 9.2 Hz), 5.10 (1H, d, *J* = 17.9 Hz), 5.72–5.80 (1H, m); <sup>13</sup>C NMR (CDCl<sub>3</sub>, 100 MHz) δ 4.0, 6.6, 33.6, 41.31, 41.37, 61.9, 62.8, 74.5, 117.4, 135.9.

### R-Ester **S3**

To a solution of **S2** (8.20 mg, 0.0270 mmol) in CH<sub>2</sub>Cl<sub>2</sub> (0.30 mL) were added (*R*)-α-methoxyphenylacetic acid (5.40 mg, 0.0324 mmol), DMAP (catalytic) and EDCI (7.70 mg, 0.0405 mmol) at room temperature under Ar atmosphere. The mixture was stirred at room

temperature for 3 h and purified by silica gel column chromatography (hexane:EtOAc = 95:5) to give the *R*-ester **S3** (12.0 mg, 0.0266 mmol, 98%) as a colorless oil:  $^1\text{H}$  NMR (400 MHz,  $\text{CDCl}_3$ )  $\delta$  0.55 (6H, q,  $J$  = 7.8 Hz), 0.91 (9H, t,  $J$  = 7.8 Hz), 1.85-2.03 (3H, m), 2.40-2.44 (1H, m), 3.54 (3H, s), 3.53-3.62 (2H, m), 4.09 (1H, dd,  $J$  = 11.7, 3.9 Hz), 4.19 (1H, dd,  $J$  = 11.7, 5.4 Hz), 4.24 (1H, d,  $J$  = 4.9 Hz), 4.40 (1H, dd,  $J$  = 13.7, 8.3 Hz), 4.74 (1H, s), 4.84 (1H, d,  $J$  = 17.0 Hz), 4.98 (1H, d,  $J$  = 10.2 Hz), 5.53-5.63 (1H, m), 7.34-7.43 (5H, m).

#### **S-Ester S4**

To a solution of **S2** (8.20 mg, 0.0270 mmol) in  $\text{CH}_2\text{Cl}_2$  (0.30 mL) were added (*S*)- $\alpha$ -methoxyphenylacetic acid (5.40 mg, 0.0324 mmol), DMAP (catalytic) and EDCI (7.70 mg, 0.0405 mmol) at room temperature under Ar atmosphere. The mixture was stirred at room temperature for 3 h and purified by silica gel column chromatography (hexane:EtOAc = 95:5) to give the *S*-ester **S4** (11.7 mg, 0.0259 mmol, 96%) as a colorless oil:  $^1\text{H}$  NMR (400 MHz,  $\text{CDCl}_3$ )  $\delta$  0.48 (6H, q,  $J$  = 7.8 Hz), 0.84 (9H, t,  $J$  = 7.8 Hz), 1.86-2.06 (3H, m), 2.31-2.36 (1H, m), 3.39 (3H, s), 3.51 (2H, dd,  $J$  = 5.1, 1.5 Hz), 4.03-4.20 (4H, m), 4.68 (1H, s), 4.90 (1H, d,  $J$  = 17.0 Hz), 4.96 (1H, d,  $J$  = 10.2 Hz), 5.53-5.63 (1H, m), 7.28-7.36 (5H, m).

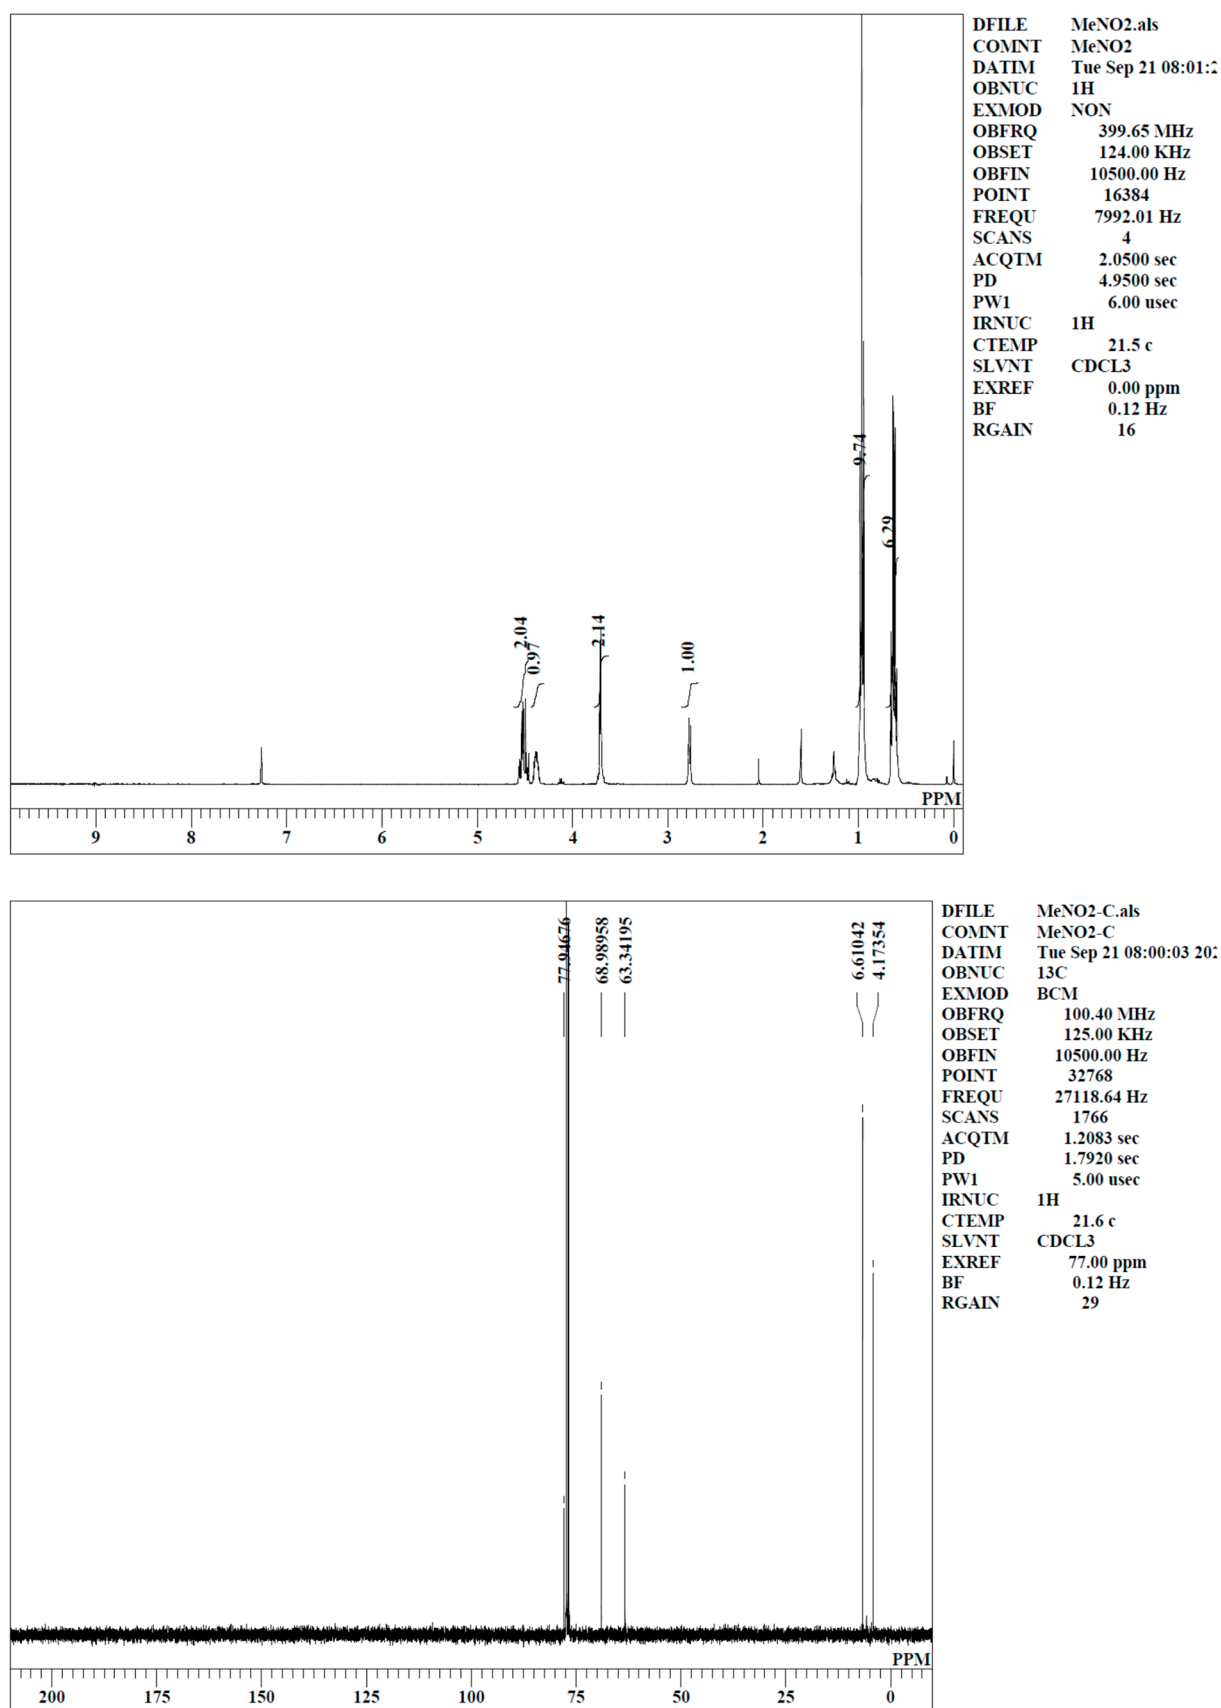

Figure S1. <sup>1</sup>H and <sup>13</sup>C NMR spectra of **S1**.

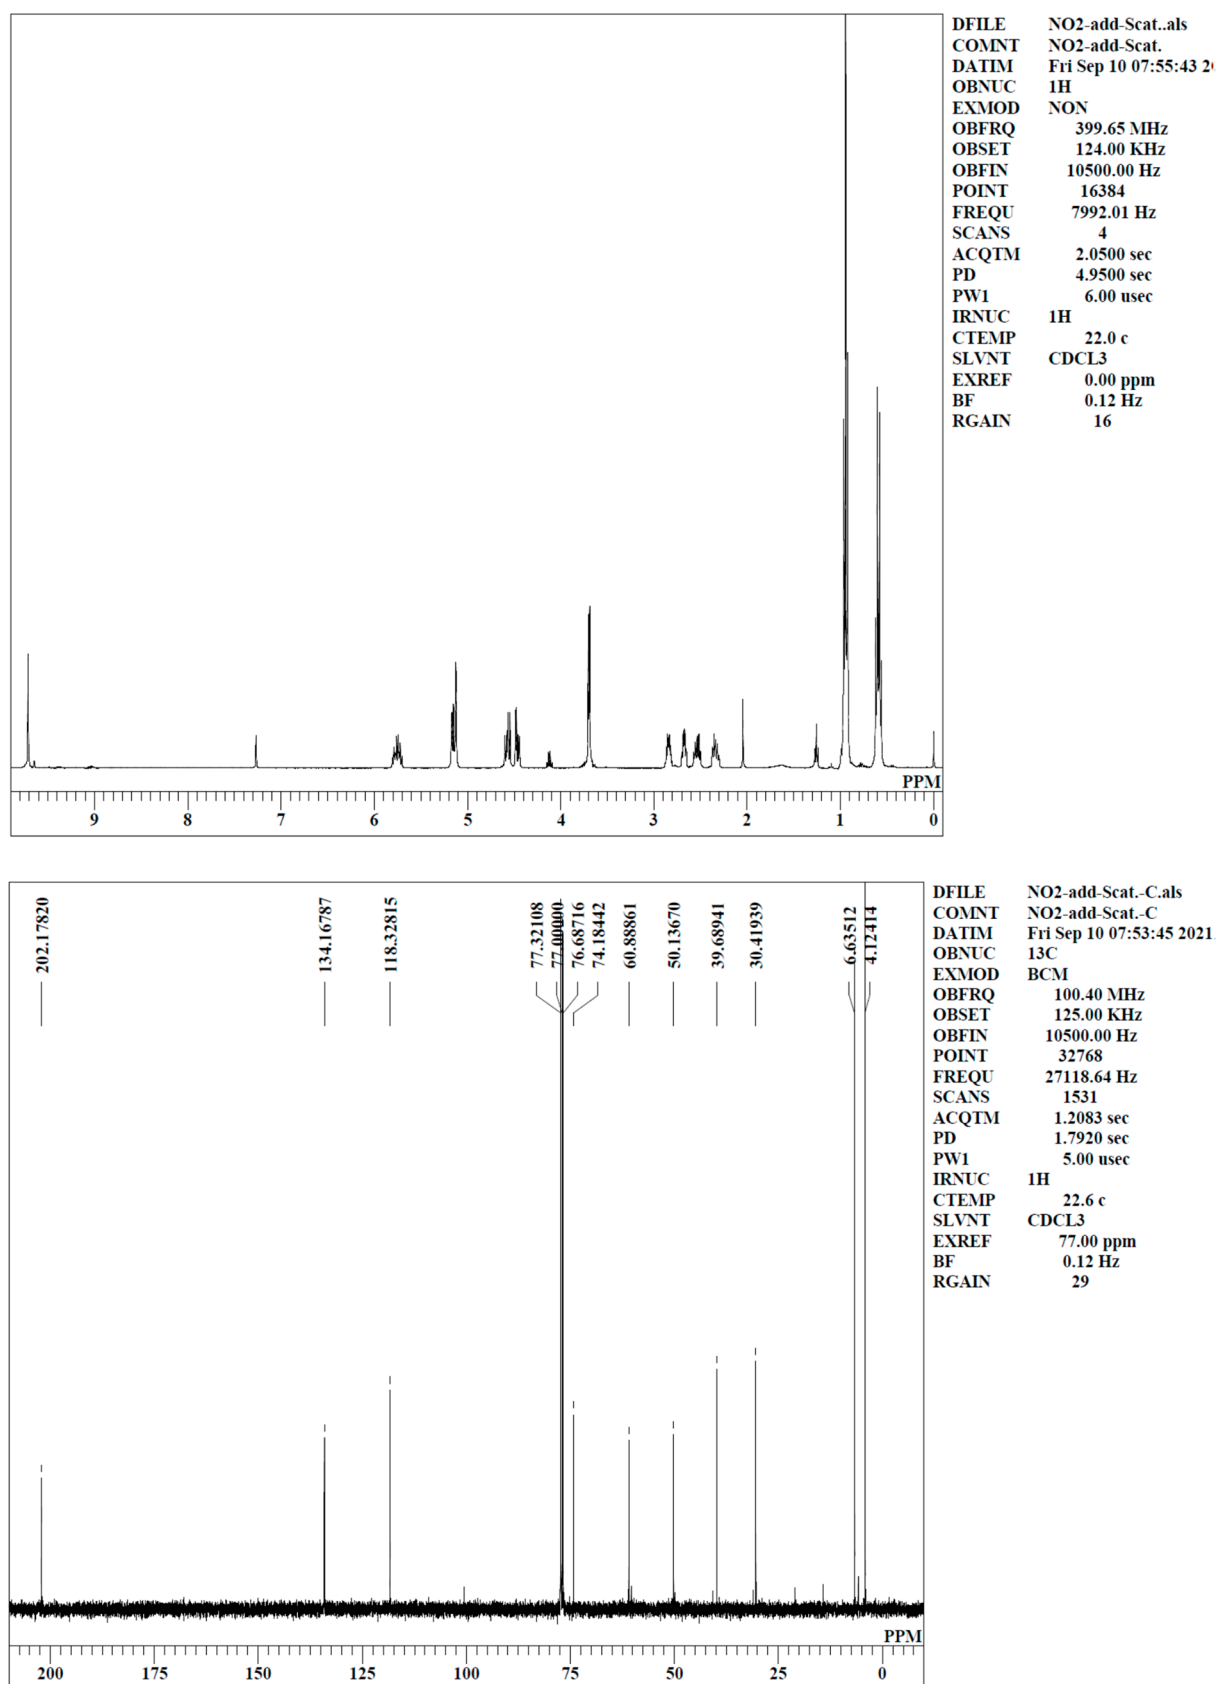

Figure S2. <sup>1</sup>H and <sup>13</sup>C NMR spectra of **9**.

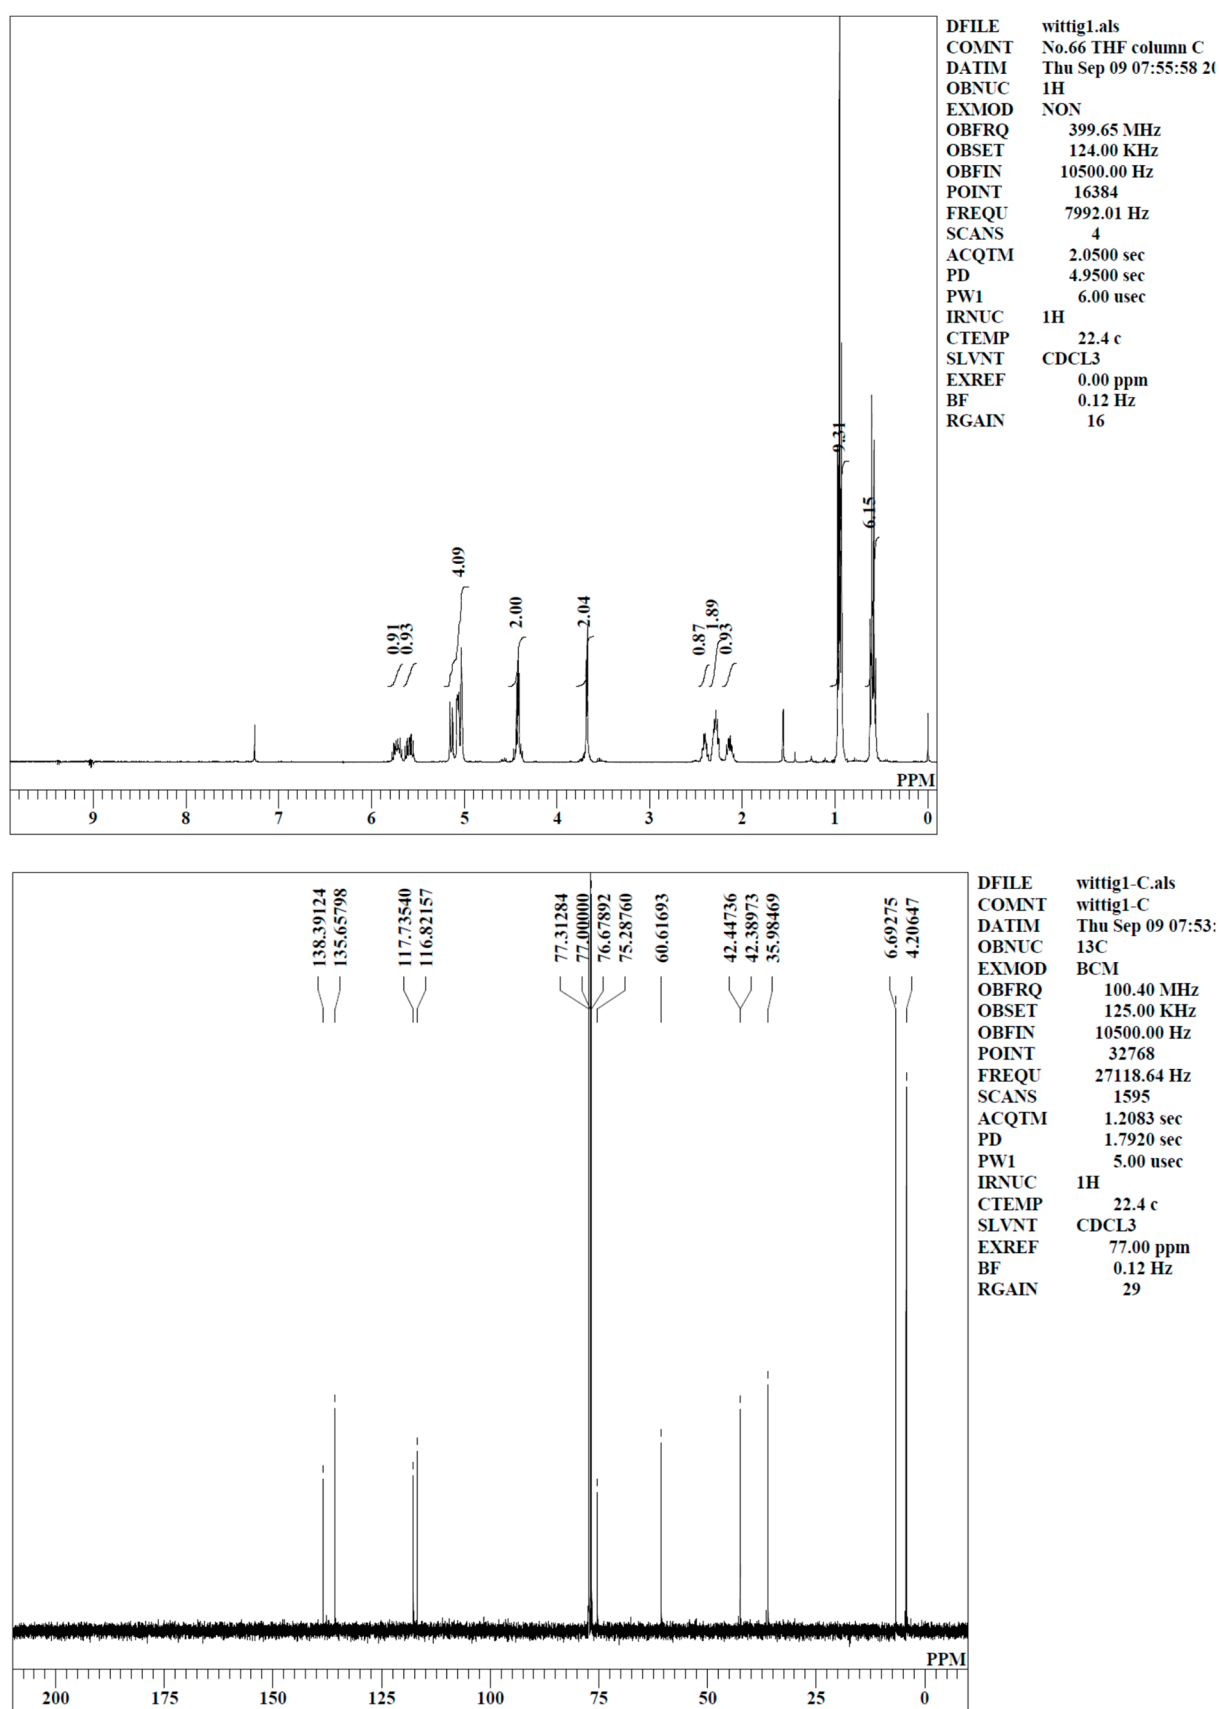Figure S3. <sup>1</sup>H and <sup>13</sup>C NMR spectra of **10**.

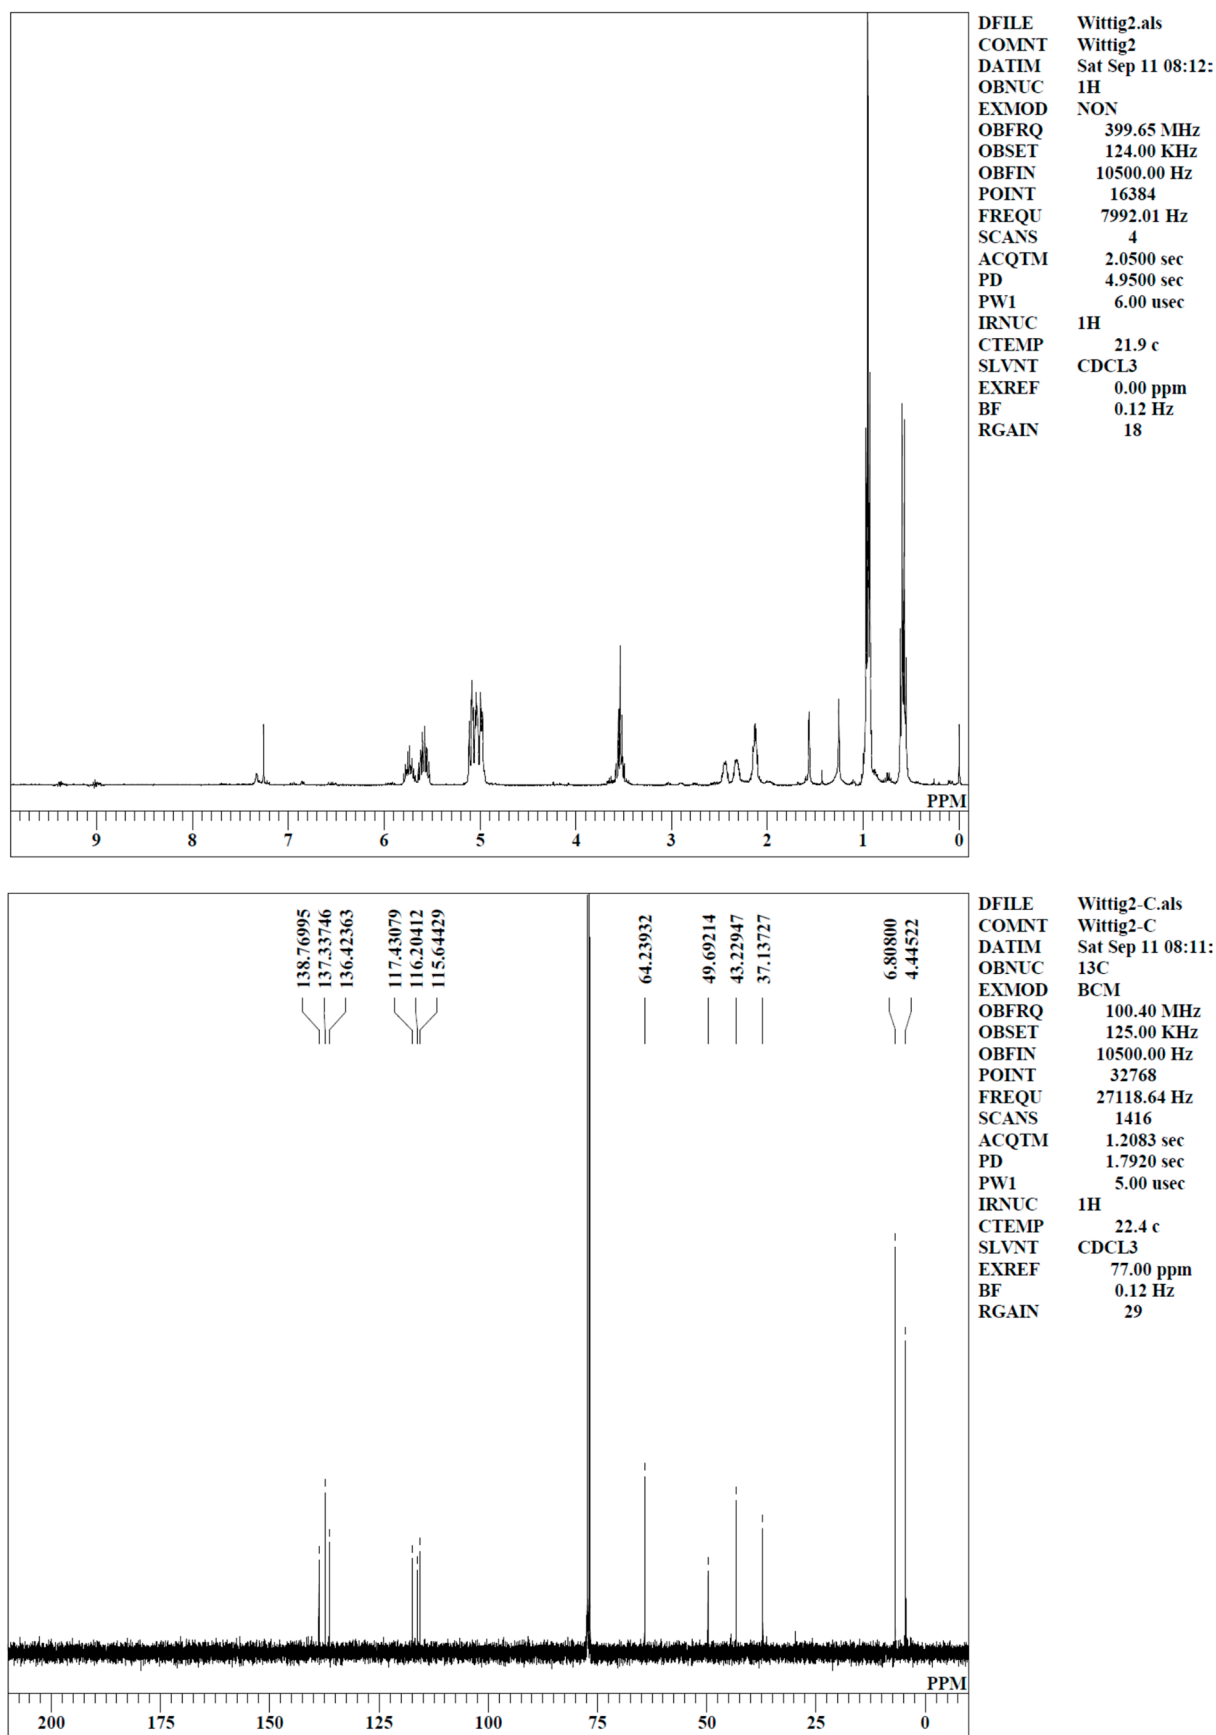

Figure S4. <sup>1</sup>H and <sup>13</sup>C NMR spectra of **14**.

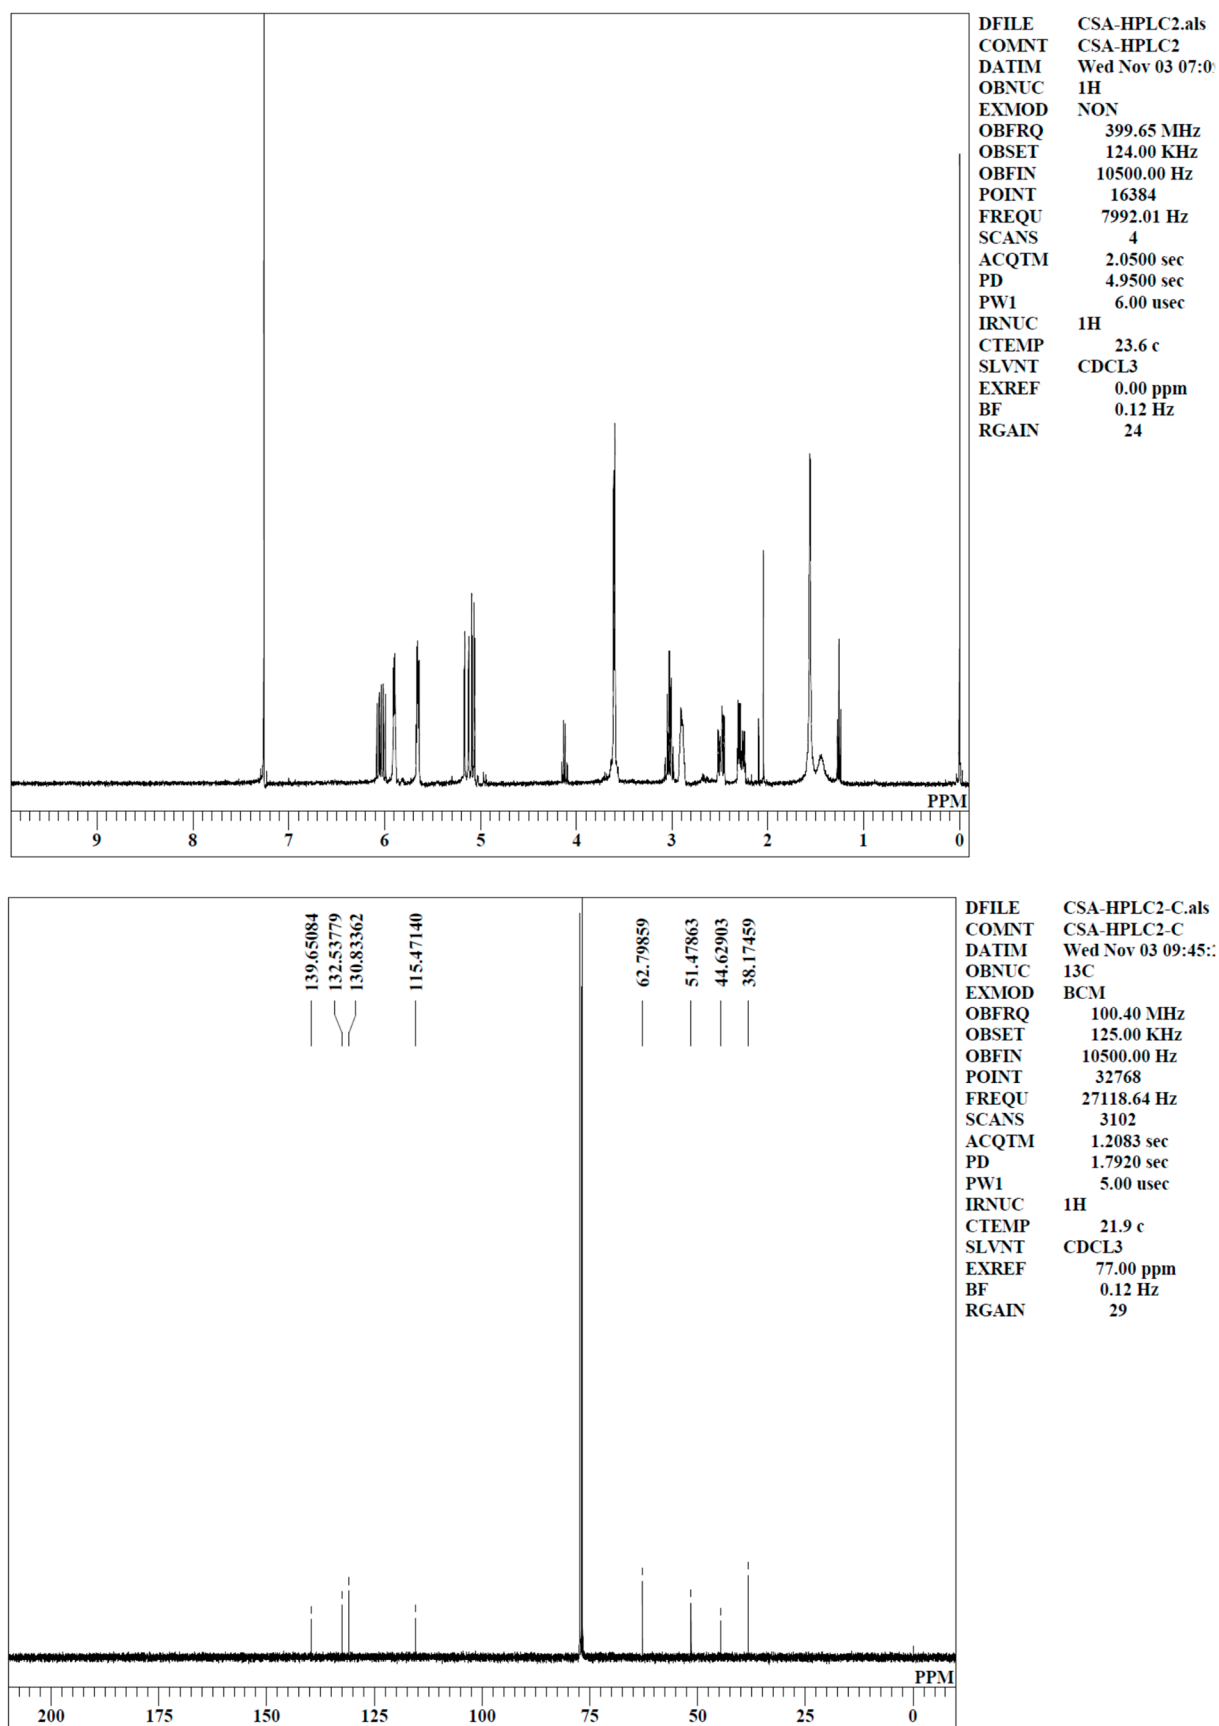

Figure S5. <sup>1</sup>H and <sup>13</sup>C NMR spectra of **15**.

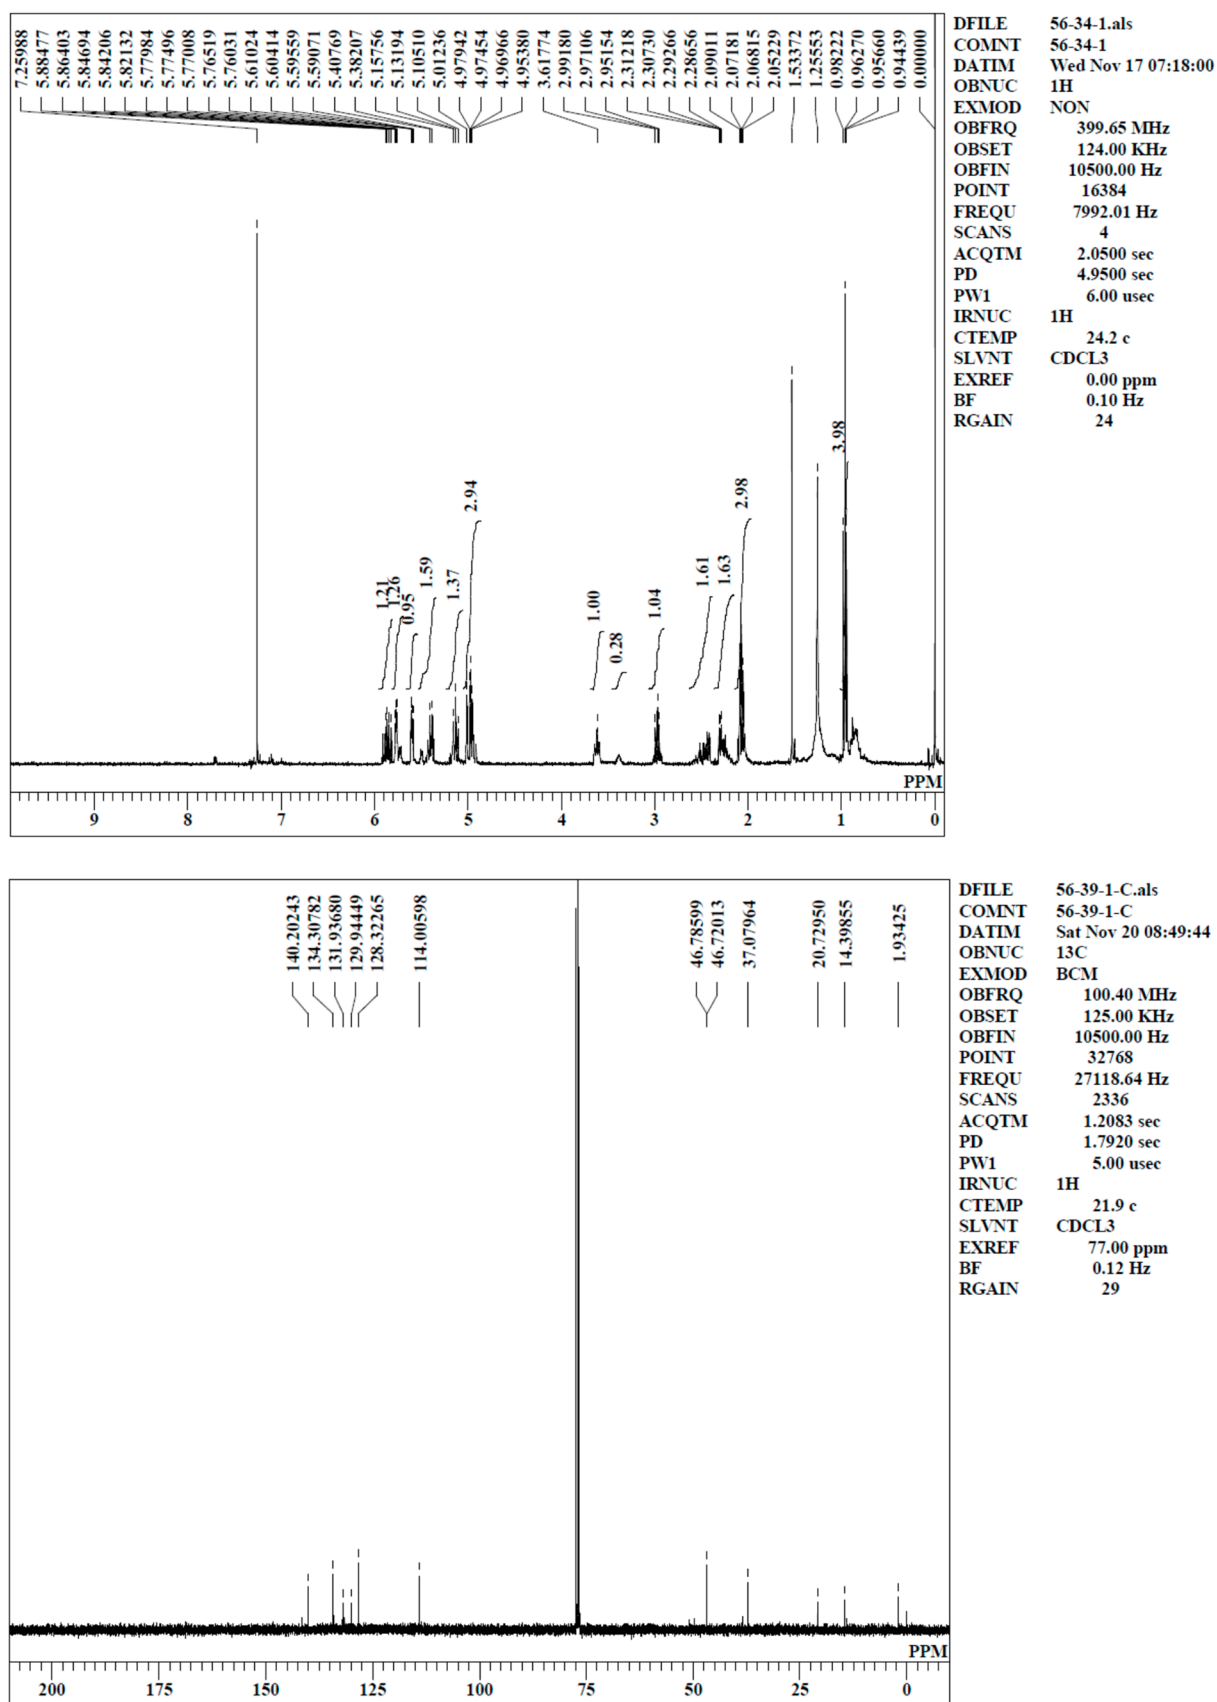Figure S6. <sup>1</sup>H and <sup>13</sup>C NMR spectra of **1**.

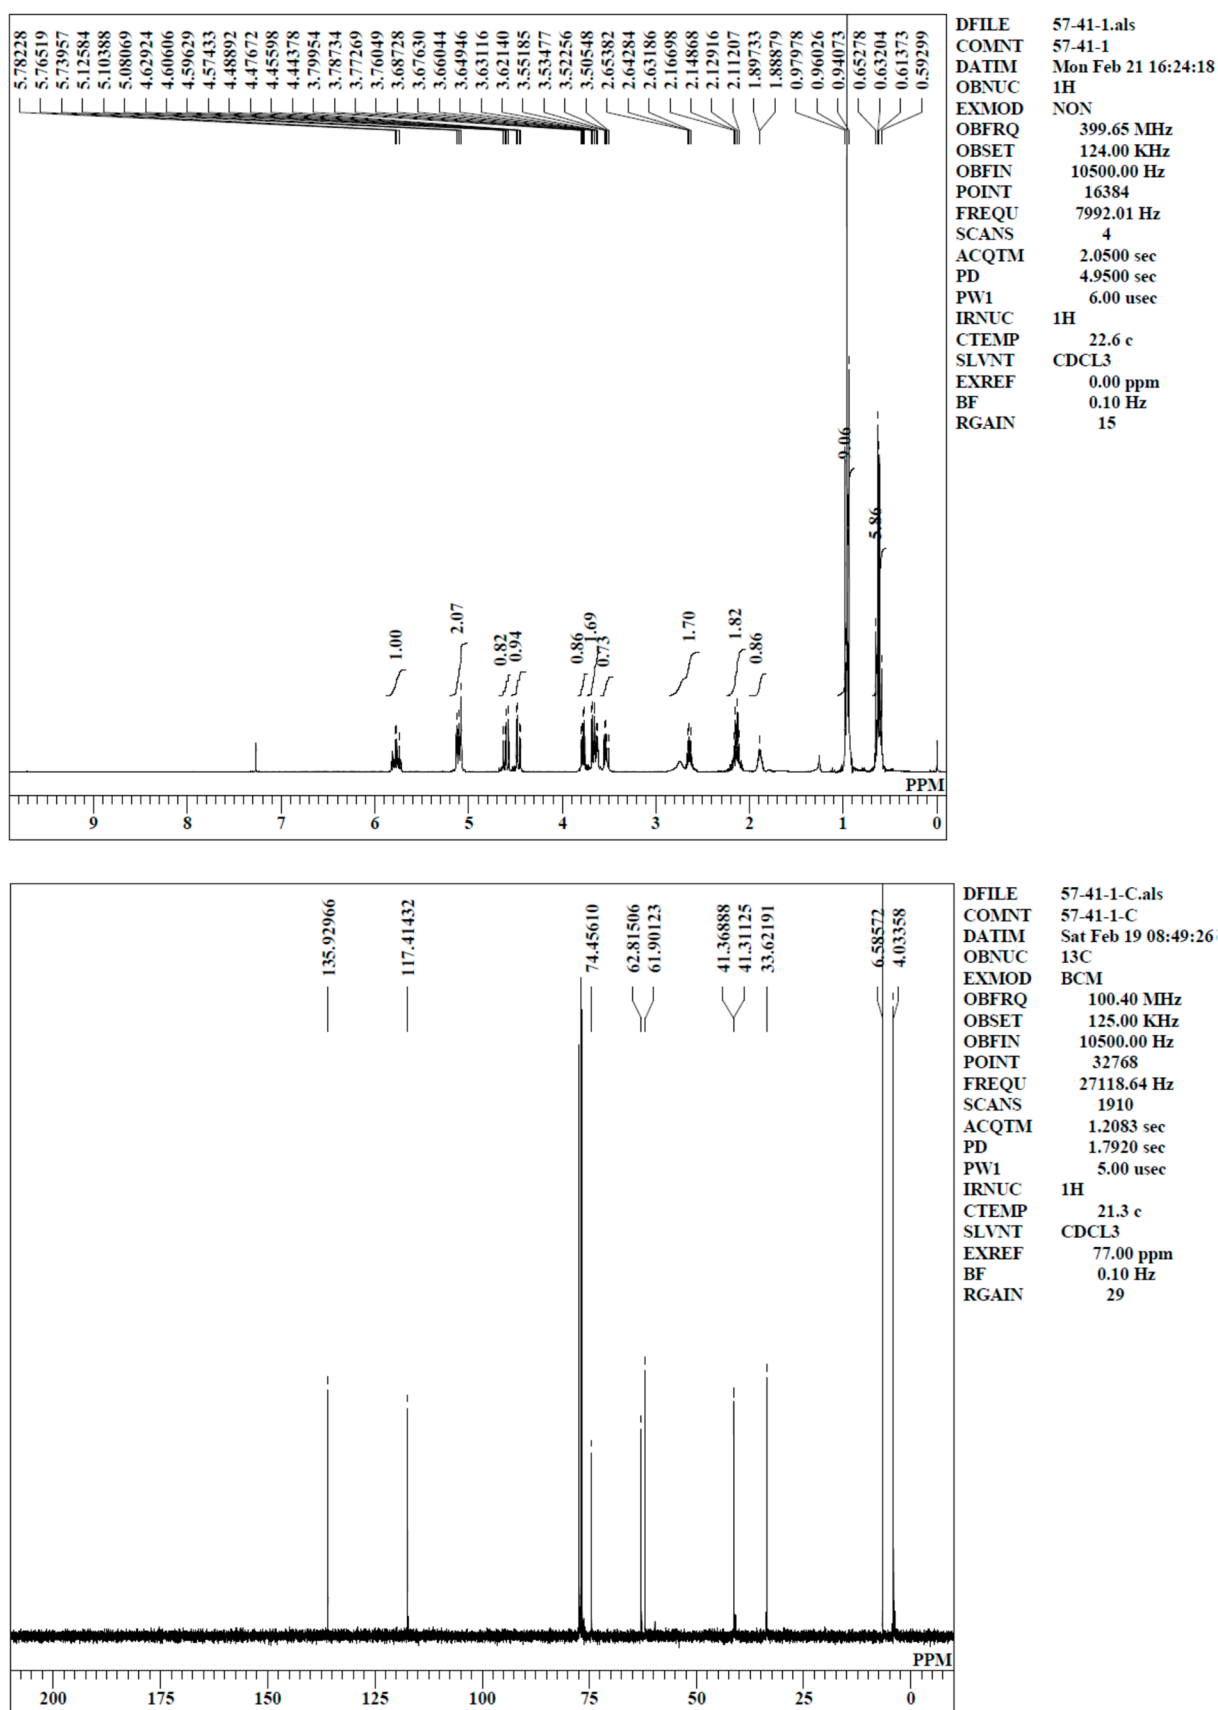Figure S7. <sup>1</sup>H and <sup>13</sup>C NMR spectra of **S2**.

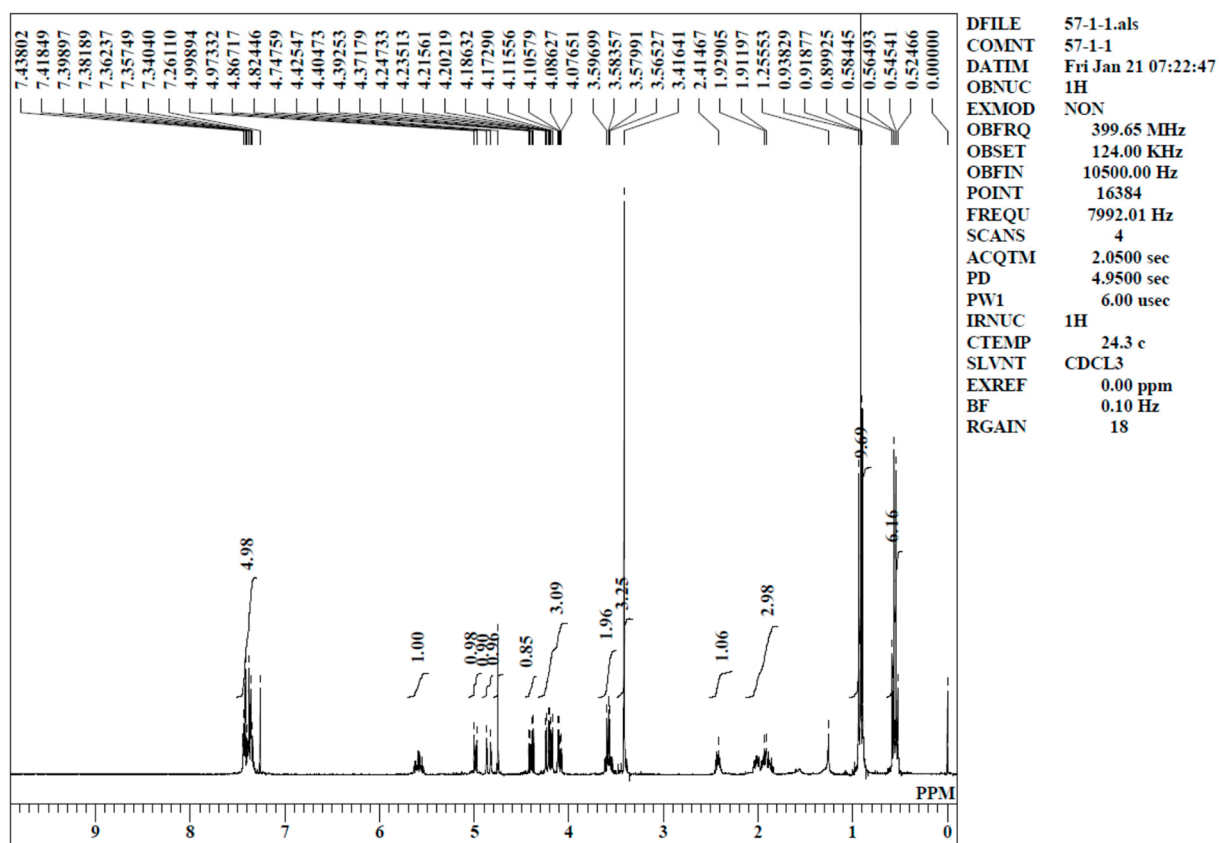Figure S8. <sup>1</sup>H NMR spectrum of **S3**.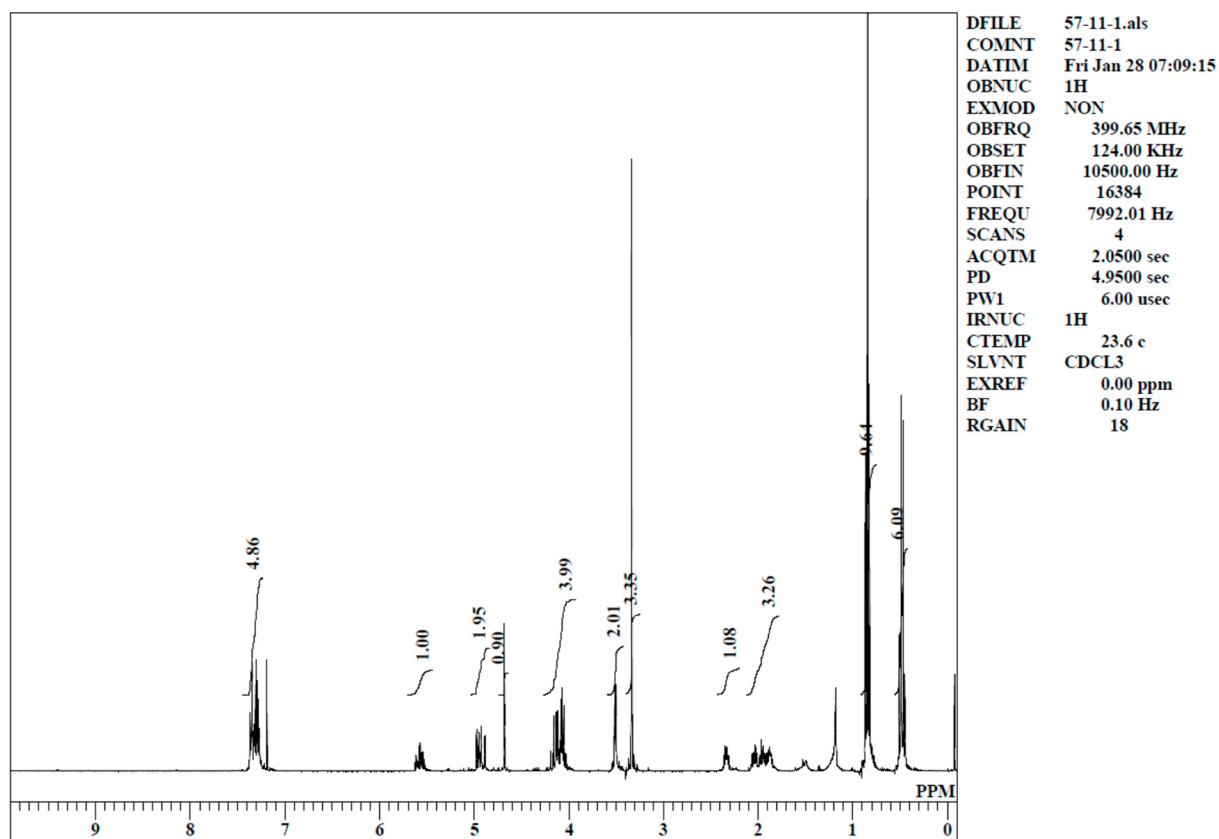Figure S9. <sup>1</sup>H NMR spectrum of **S4**.
